# Supplementary material
Source: ML conference proceedings conference paper supplement (https://proceedings.mlr.press/v164/tejwani22a.html)
Supplement: Supplementary file 1 [file tejwani22a-supp.zip]

Archive with 2 entries (2 files):
- Social_MDP_Supplemental.pdf
- __MACOSX/._Social_MDP_Supplemental.pdf
